# Supplementary material for: Sertoli Cell-Only Syndrome: Behind the Genetic Scenes
Source: Hindawi journal article supplement (doi:10.1155/2016/6191307), 2016-01-01
Supplement: f1 [file 6191307.f1.pdf]

| Region          | Assay         | Gene     | Location on Transcript or C | Location chromosom<br>hg19 |
|-----------------|---------------|----------|-----------------------------|----------------------------|
| <b>1q23.1</b>   | Hs02369977_cn | PRCC     | Overlaps Exon 7             | 156770617                  |
| <b>4q13.3</b>   | Hs02394202_cn | MTHFD2L  | Overlaps Exon 3 - Intron 3  | 75041091                   |
| <b>13q12.11</b> | Hs02812305_cn | ZMYM5    | Within Exon 3               | 20426264                   |
| <b>16p13.11</b> | Hs03938043_cn | PDXDC1   | Within Intron 1             | 15073771                   |
| <b>18q21.2</b>  | Hs02394202_cn | C18ORF26 | Overlaps Exon 2 - Intron 2  | 52262343                   |

Supplementary table: overview of the Taqman copy number assays
